# Supplementary material
Source: publisher figshare collection journal article supplement (https://acs.figshare.com/ndownloader/files/10663960)
Supplement: Supplementary file 1 [file 10663960]

## Supporting Information for

# Bond Ellipticity Alternation: An Accurate Descriptor of Non-linear Optical Properties of $\pi$ -Conjugated Chromophores

Thiago O. Lopes,<sup>†</sup> Daniel F. Scalabrini Machado,<sup>†</sup> Chad Risko,<sup>§</sup> Jean-Luc Brédas<sup>\*,‡</sup>  
and Heibbe C. B. de Oliveira<sup>\*,†</sup>

<sup>†</sup> *Laboratório de Estrutura Eletrônica e Dinâmica Molecular (LEEDMOL), Institute of Chemistry, University of Brasília, Campus Darcy Ribeiro, Brasília, Brazil.*

<sup>§</sup> *Department of Chemistry and Center for the Applied Energy Research, University of Kentucky, Lexington, Kentucky 40506-0055, United States of America.*

<sup>‡</sup> *School of Chemistry and Biochemistry and Center for Organic Photonics and Electronics, Georgia Institute of Technology, Atlanta, Georgia 30332-0400, United States of America.*

## Corresponding Authors

\*Email: [jean-luc.bredas@chemistry.gatech.edu](mailto:jean-luc.bredas@chemistry.gatech.edu)

\*Email: [heibbe@unb.br](mailto:heibbe@unb.br)

## **Table of Contents:**

### **A. Additional results for the 5-carbon streptocyanines**

|                                        |     |
|----------------------------------------|-----|
| <b>A1. Dipole moment</b>               | S1  |
| <b>A2. First-order polarizability</b>  | S7  |
| <b>A3. Second-order polarizability</b> | S9  |
| <b>A4. Third-order polarizability</b>  | S10 |

## A. Additional results for the 5-carbon streptocyanine

### A1. Dipole Moment

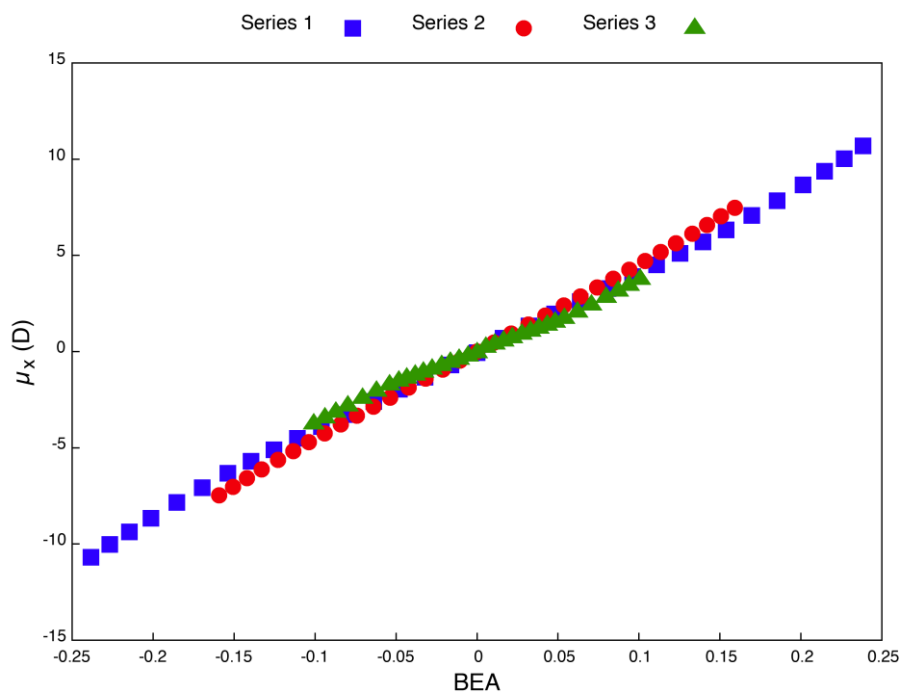

**Figure S1.** Correlation of  $\mu_x$  with BEA for the 5C streptocyanine in Series 1, 2, 3, as obtained at the  $\omega$ B97XD/6-31G(d, p) level of theory.

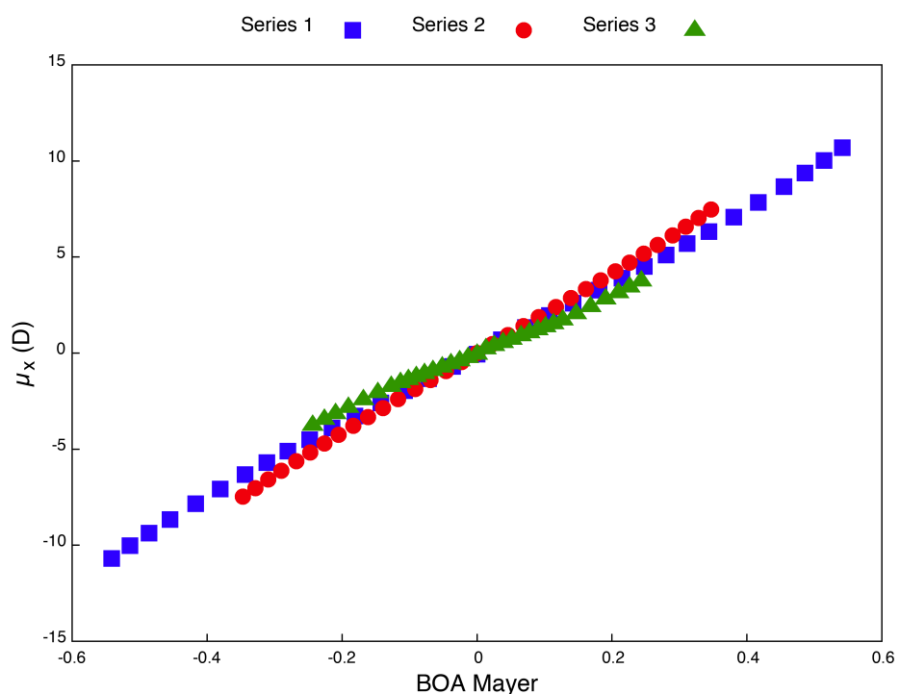

**Figure S2.** Correlation of  $\mu_x$  with BOA Mayer for the 5C streptocyanine in Series 1, 2, 3, as obtained at the  $\omega$ B97XD/6-31G(d, p) level of theory.

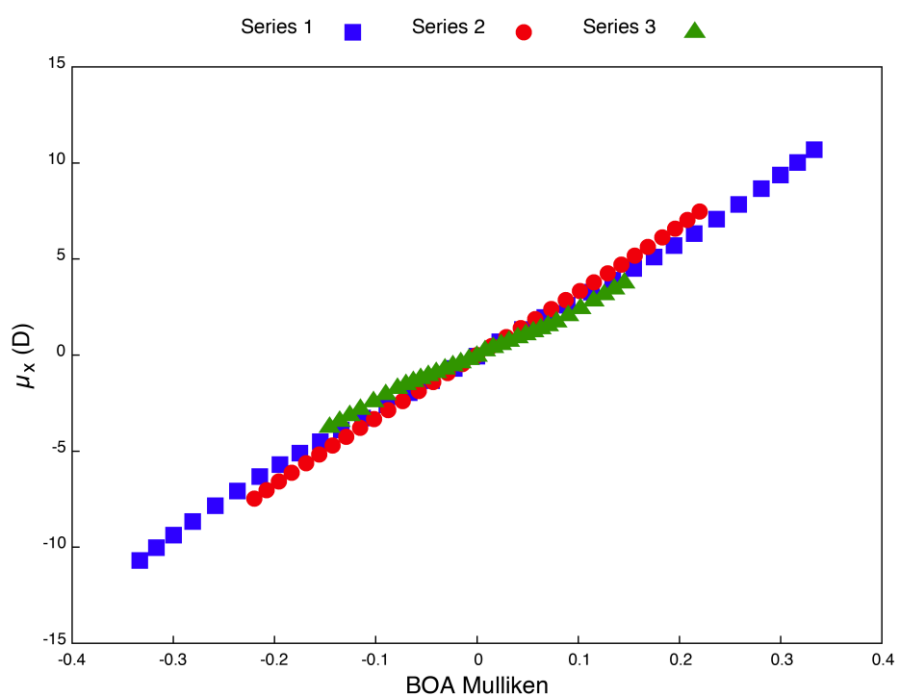

**Figure S3.** Correlation of  $\mu_x$  with BOA Mulliken for the 5C streptocyanine in Series 1, 2, 3, as obtained at the  $\omega$ B97XD/6-31G(d, p) level of theory.

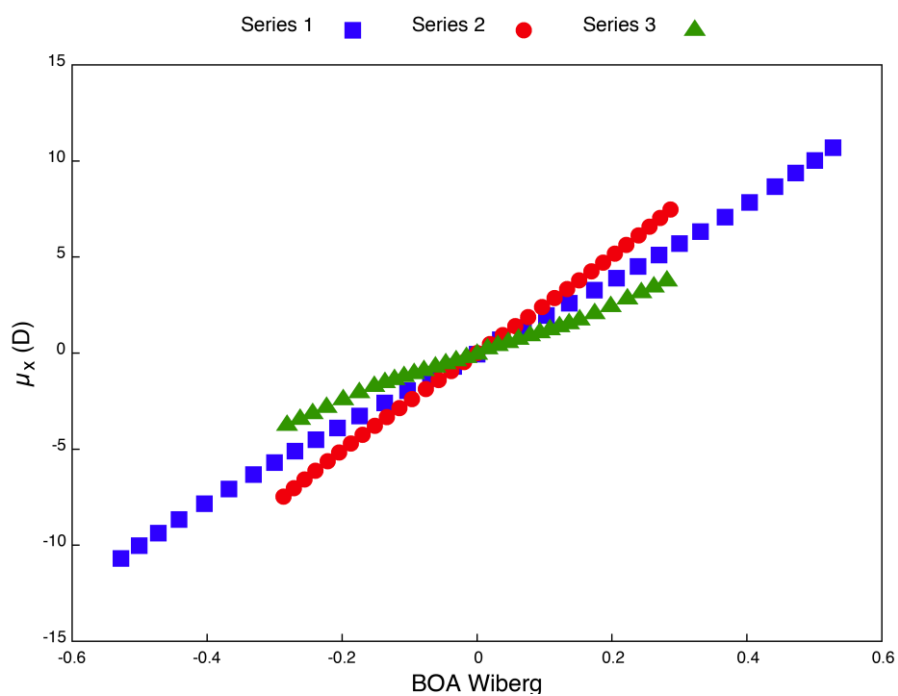

**Figure S4.** Correlation of  $\mu_x$  with BOA Wiberg for the 5C streptocyanine in Series 1, 2, 3, as obtained at the  $\omega$ B97XD/6-31G(d, p) level of theory.

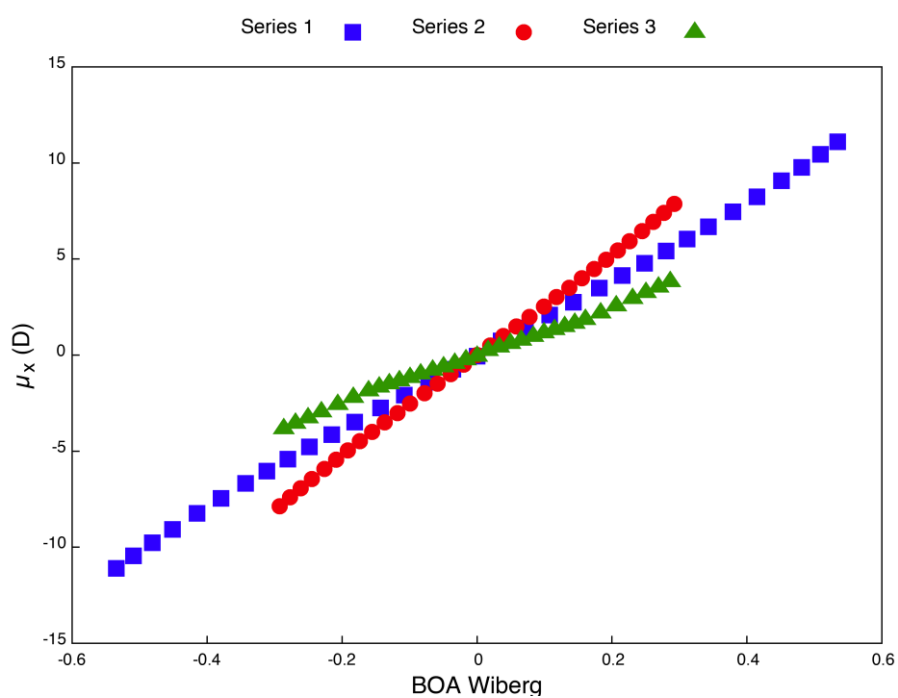

**Figure S5.** Correlation of  $\mu_x$  with BOA Wiberg for the 5C streptocyanine in Series 1, 2, 3, as obtained at the  $\omega$ B97XD/6-31++G(d, p) level of theory.

## A2. First-Order Polarizability

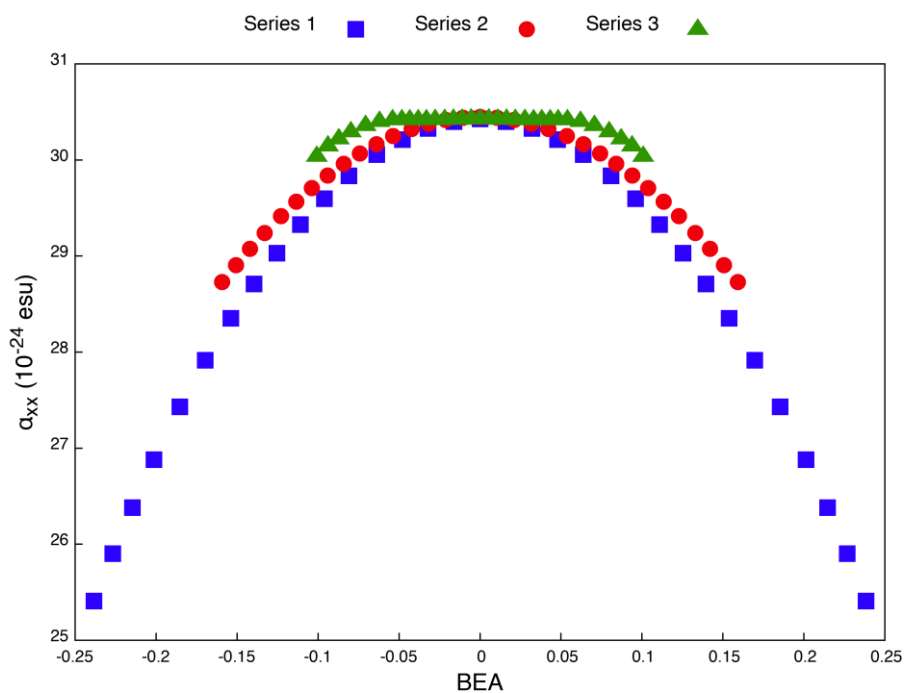

**Figure S6.** Correlation of  $\alpha_{xx}$  with BEA for the 5C streptocyanine in Series 1, 2, 3, as obtained at the  $\omega$ B97XD/6-31G(d, p) level of theory.

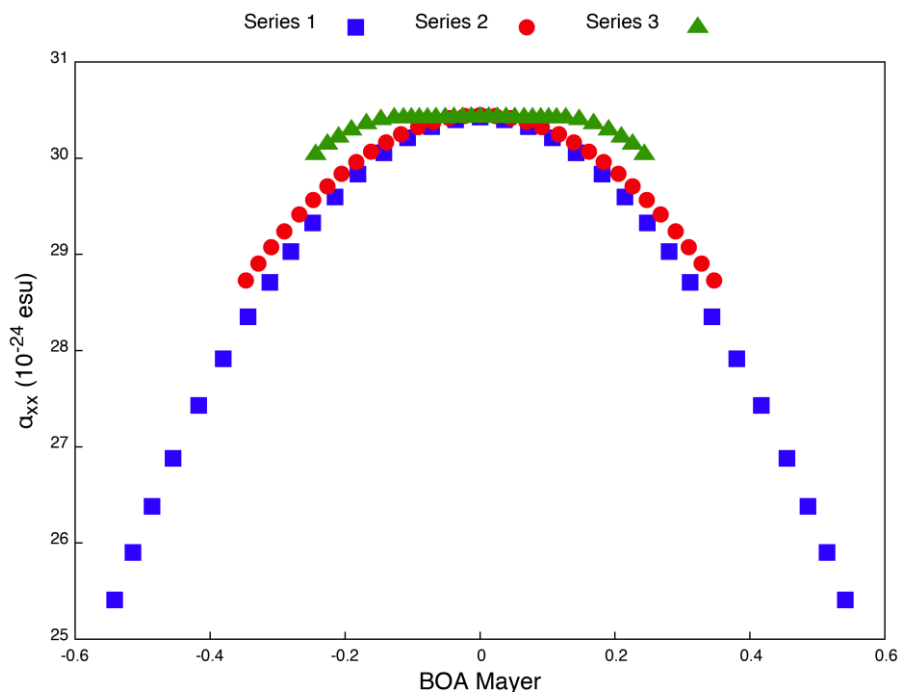

**Figure S7.** Correlation of  $\alpha_{xx}$  with BOA Mayer for the 5C streptocyanine in Series 1, 2, 3, as obtained at the  $\omega$ B97XD/6-31G(d, p) level of theory.

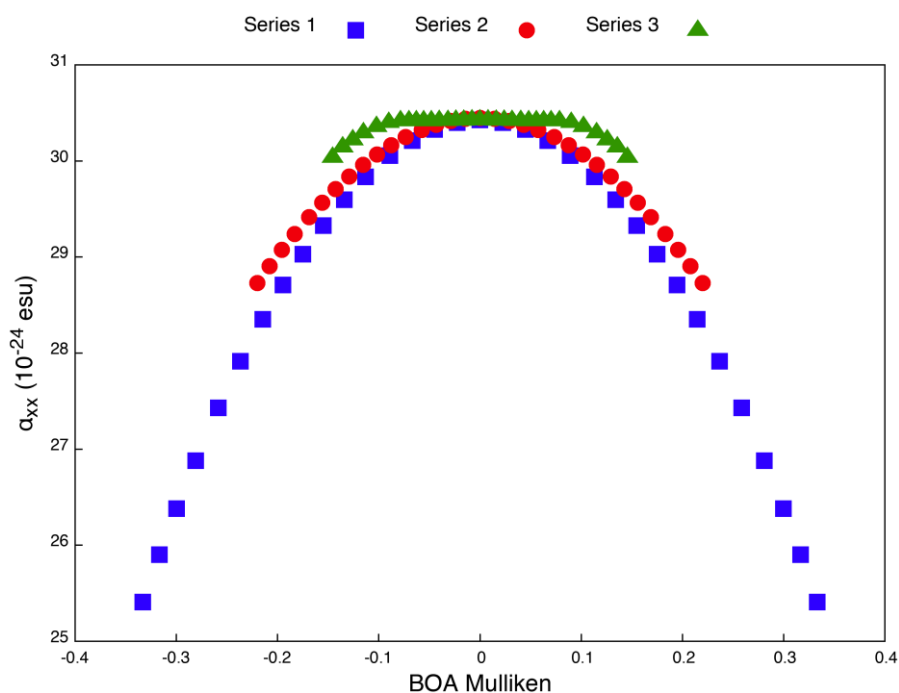

**Figure S8.** Correlation of  $\alpha_{xx}$  with BOA Mulliken for the 5C streptocyanine in Series 1, 2, 3, as obtained at the  $\omega$ B97XD/6-31G(d, p) level of theory.

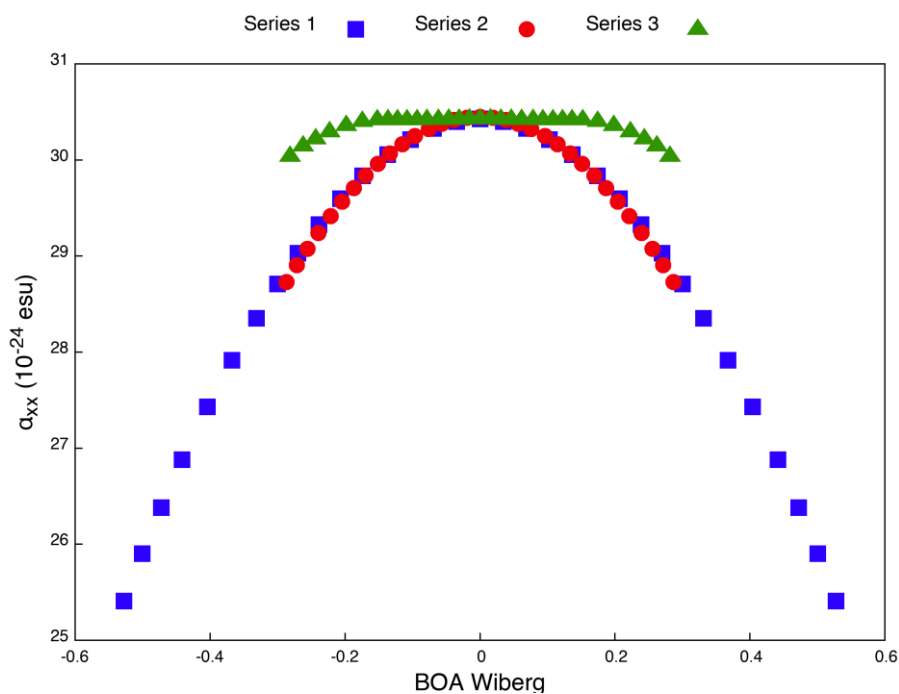

**Figure S9.** Correlation of  $\alpha_{xx}$  with BOA Wiberg for the 5C streptocyanine in Series 1, 2, 3, as obtained at the  $\omega$ B97XD/6-31G(d, p) level of theory.

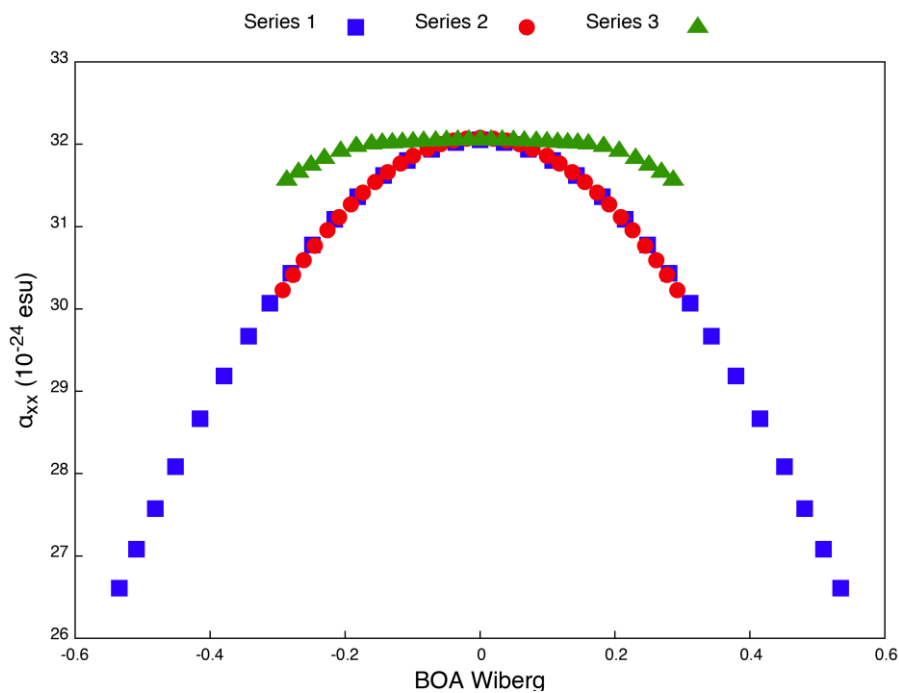

**Figure S10.** Correlation of  $\alpha_{xx}$  with BOA Wiberg for the 5C streptocyanine in Series 1, 2, 3, as obtained at the  $\omega$ B97XD/6-31++G(d, p) level of theory.

### A3. Second-Order Polarizability

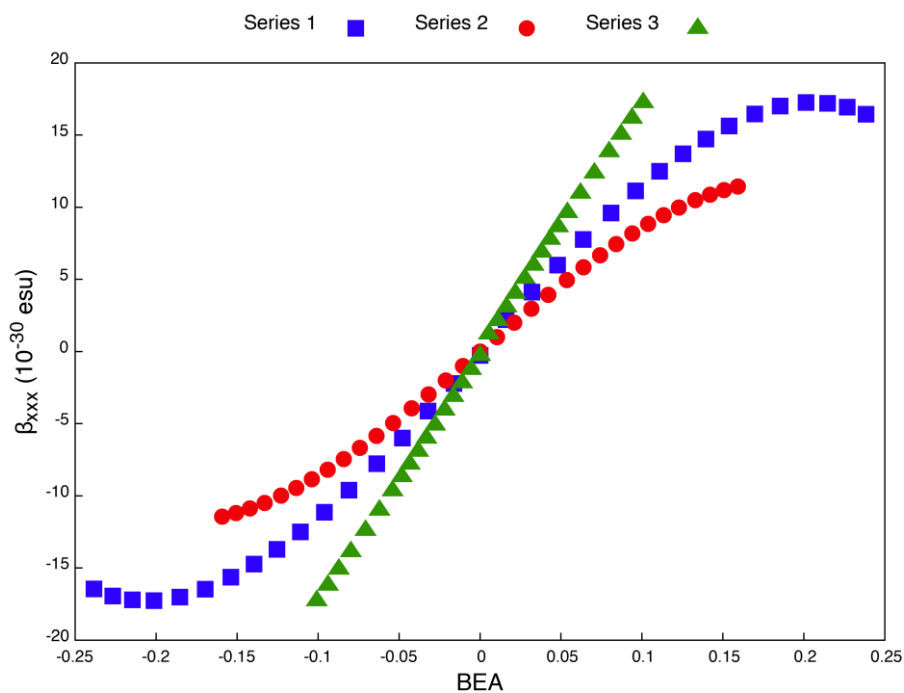

**Figure S11.** Correlation of  $\beta_{xxx}$  with BEA for the 5C streptocyanine in Series 1, 2, 3, as obtained at the  $\omega$ B97XD/6-31G(d, p) level of theory.



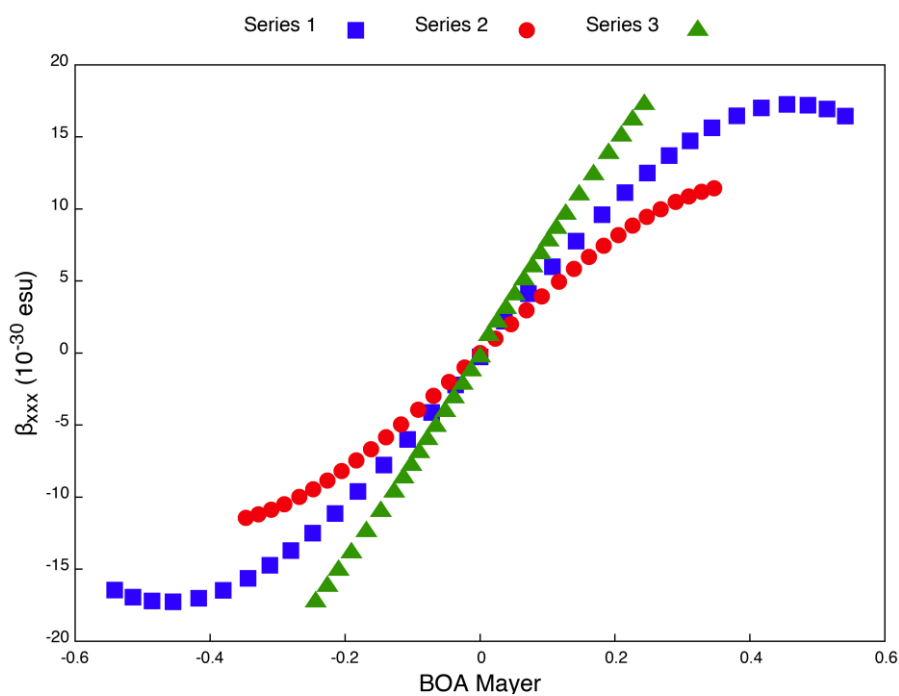

**Figure S12.** Correlation of  $\beta_{xxx}$  with BOA Mayer for the 5C streptocyanine in Series 1, 2, 3, as obtained at the  $\omega$ B97XD/6-31G(d, p) level of theory.

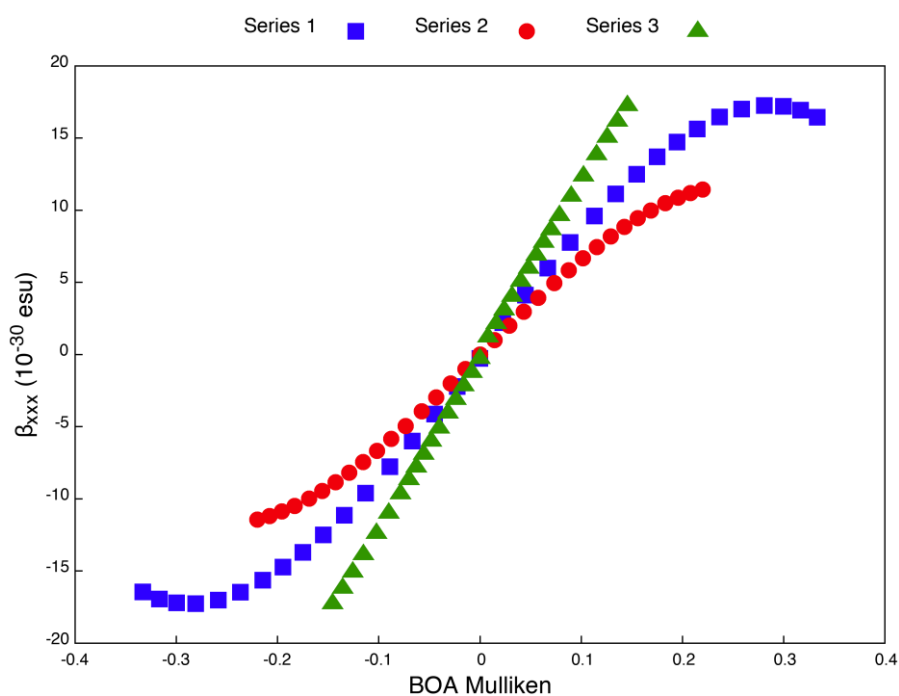

**Figure S13.** Correlation of  $\beta_{xxx}$  with BOA Mulliken for the 5C streptocyanine in Series 1, 2, 3, as obtained at the  $\omega$ B97XD/6-31G(d, p) level of theory.

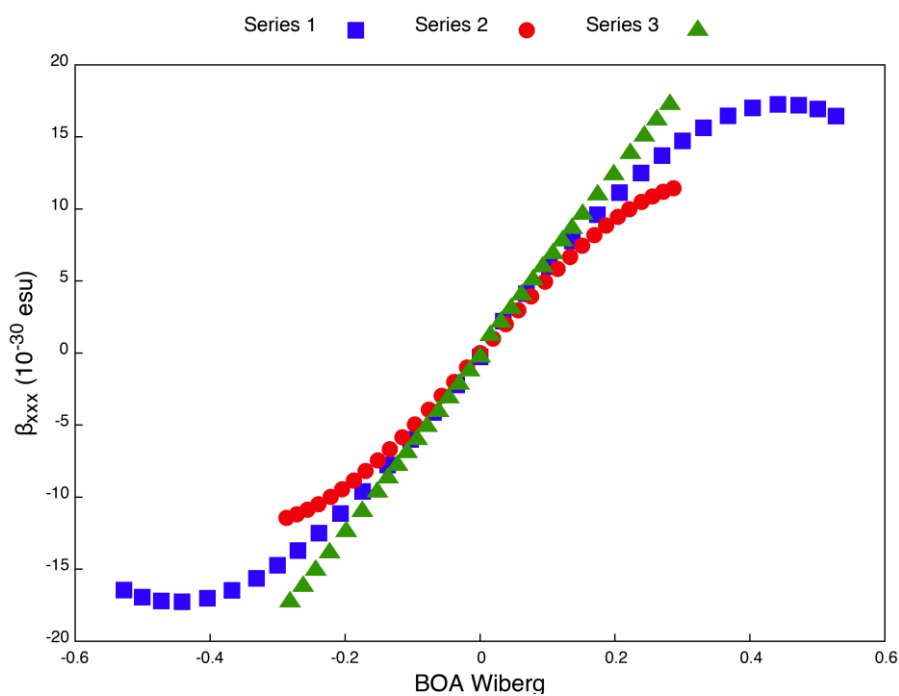

**Figure S14.** Correlation of  $\beta_{xxx}$  with BOA Wiberg for the 5C streptocyanine in Series 1, 2, 3, as obtained at the  $\omega$ B97XD/6-31G(d, p) level of theory.

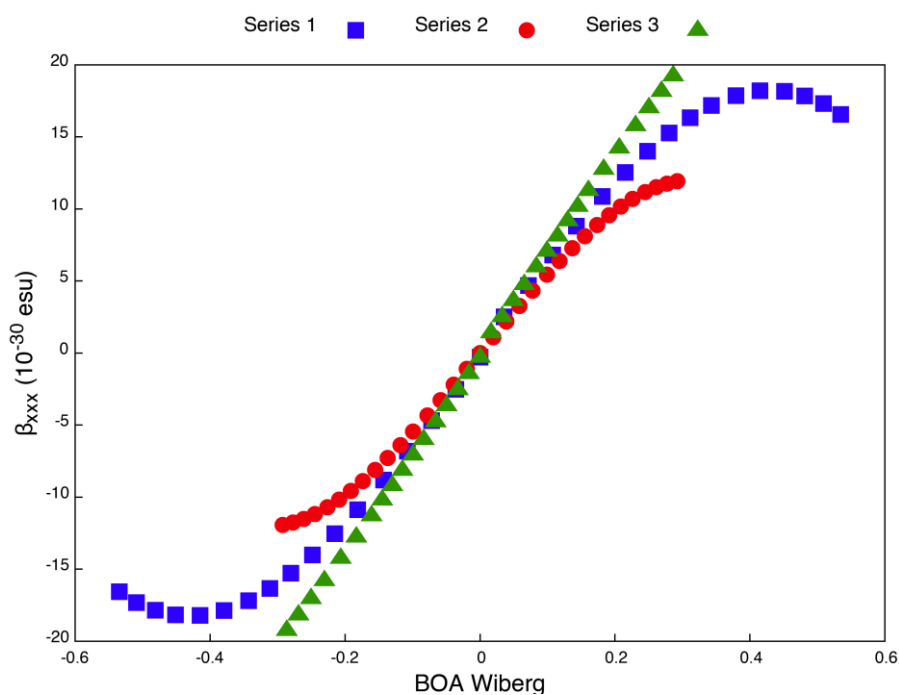

**Figure S15.** Correlation of  $\beta_{xxx}$  with BOA Wiberg for the 5C streptocyanine in Series 1, 2, 3, as obtained at the  $\omega$ B97XD/6-31++G(d, p) level of theory.

#### A4. Third-Order Polarizability

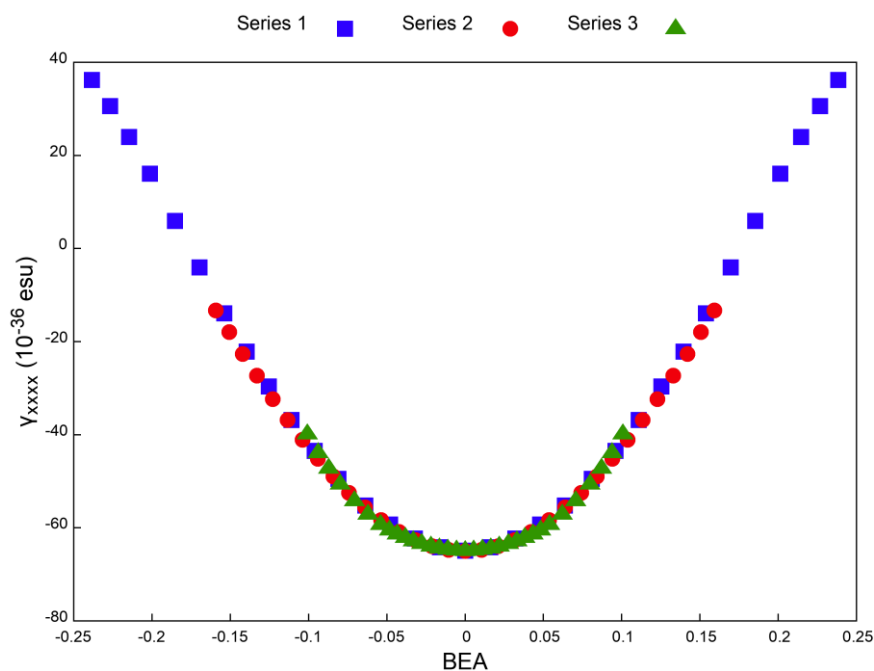

**Figure S16.** Correlation of  $\gamma_{xxxx}$  with BEA for the 5C streptocyanine in Series 1, 2, 3, as obtained at the  $\omega$ B97XD/6-31G(d, p) level of theory.

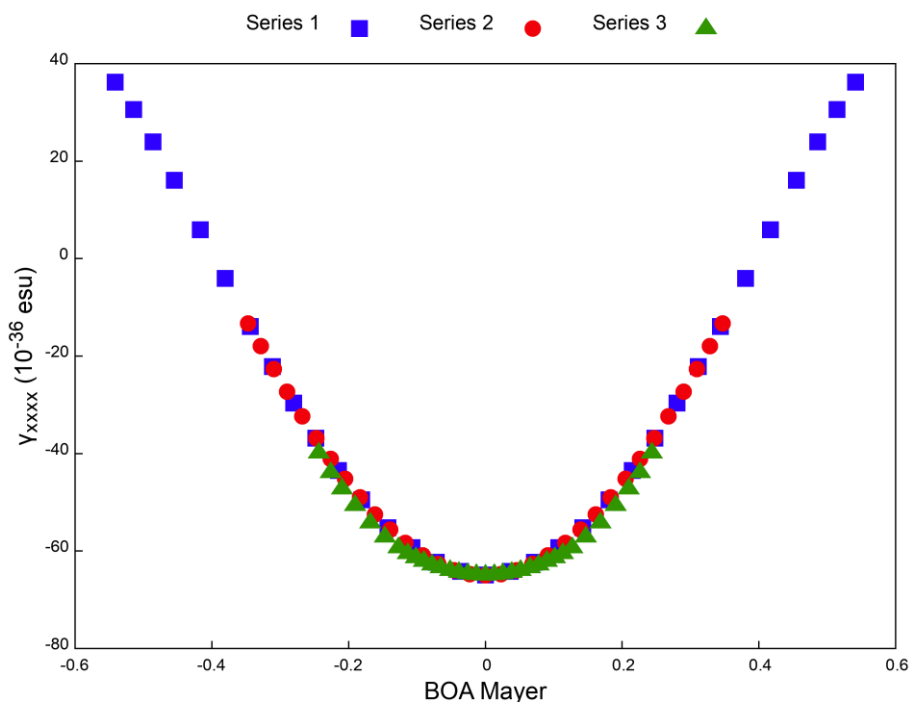

**Figure S17.** Correlation of  $\gamma_{xxxx}$  with BOA Mayer for the 5C streptocyanine in Series 1, 2, 3, as obtained at the  $\omega$ B97XD/6-31G(d, p) level of theory.

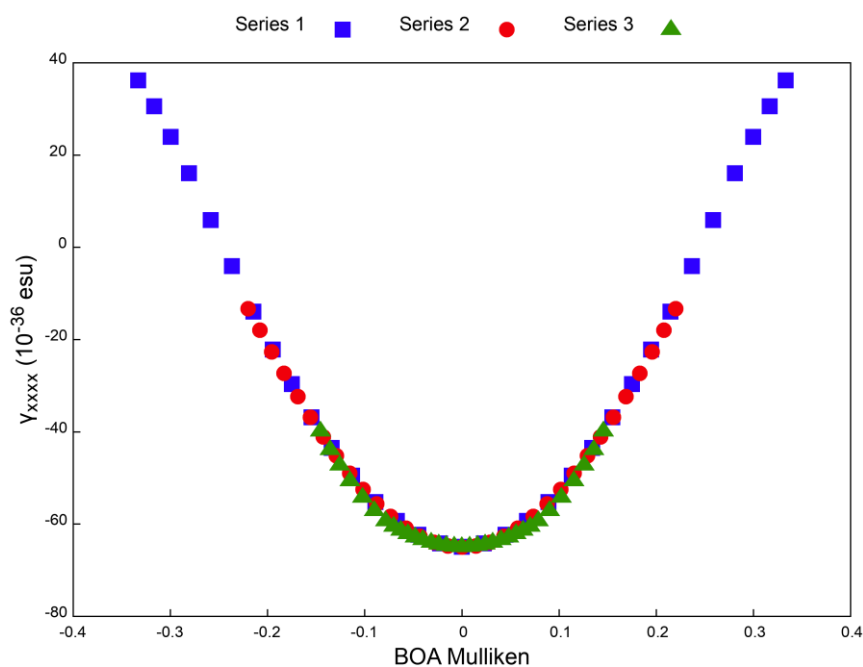

**Figure S18.** Correlation of  $\gamma_{xxxx}$  with BOA Mulliken for the 5C streptocyanine in Series 1, 2, 3, as obtained at the  $\omega$ B97XD/6-31G(d, p) level of theory.

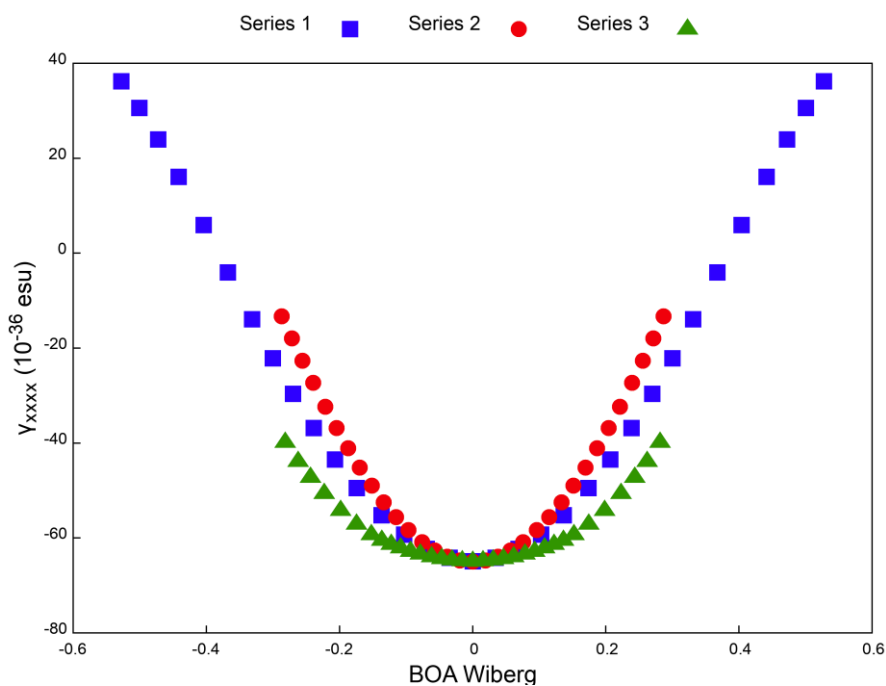

**Figure S19.** Correlation of  $\gamma_{xxxx}$  with BOA Wiberg for the 5C streptocyanine in Series 1, 2, 3, as obtained at the  $\omega$ B97XD/6-31G(d, p) level of theory.

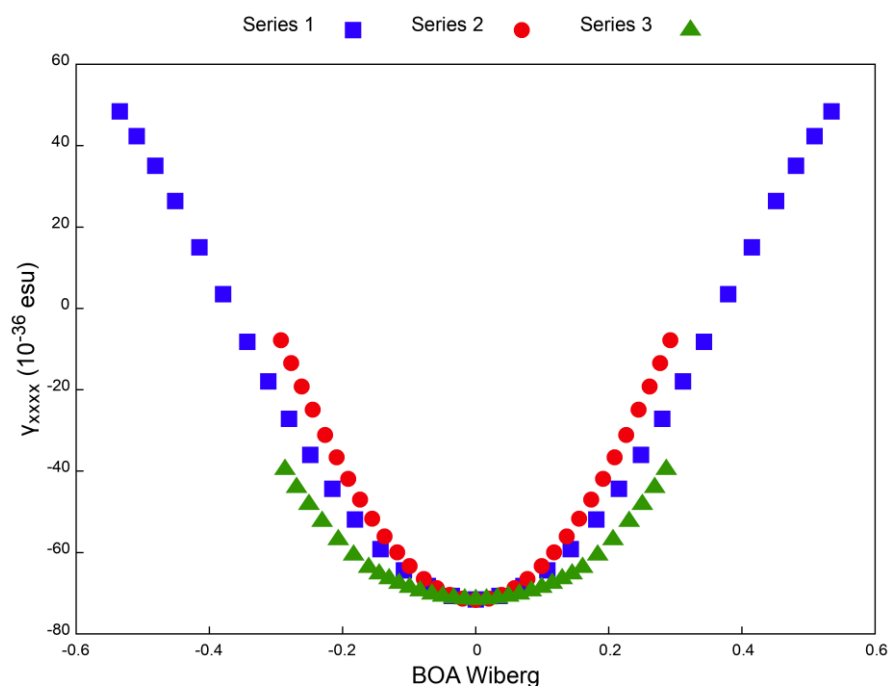

**Figure S20.** Correlation of  $\gamma_{xxxx}$  with BOA Wiberg for the 5C streptocyanine in Series 1, 2, 3, as obtained at the  $\omega$ B97XD/6-31++G(d, p) level of theory.
